# Supplementary material for: Aptamer-based detection of melamine in milk using an evanescent wave fiber sensor
Source: Royal Society of Chemistry journal article supplement (doi:10.1039/c8ay01594e), 2018-01-01
Supplement: c8ay01594e1.pdf [file c8ay01594e1.pdf]

## Aptamer-based detection of melamine in milk using an evanescent wave fiber sensor

Yong Qiu<sup>1</sup>, Yunfei Tang<sup>1,2\*</sup>, Bing Li<sup>3</sup>, Chunmei Gu<sup>4</sup>, Miao He<sup>1\*</sup>

<sup>1</sup> State Key Joint Laboratory of Environment Simulation and Pollution Control, School of Environment, Tsinghua University, Beijing 100084, China

<sup>2</sup> Ecological Environmental Protection Investments Company, China Communications Construction Corporation, Beijing, 100013, China

<sup>3</sup> School of Energy and Environmental Engineering, University of Beijing Science and Technology, Beijing, 100083, China

<sup>4</sup> School of Chemistry, Tsinghua University, Beijing 100084, China

\*Corresponding authors:

(Y. Tang) yunfeitang@yeah.net; (M. He) hemiao@tsinghua.edu.cn

Figure S1. Structures of the chemicals for selectivity analysis

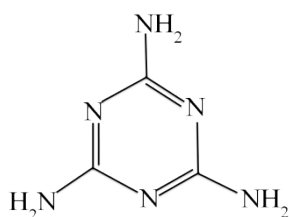

Melamine

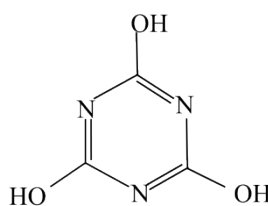

cyanuric acid

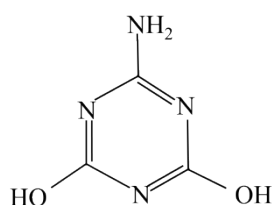

ammelide

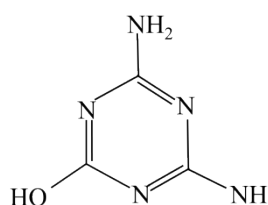

ammeline

Table S1 Information of the chemicals for selectivity analysis

| Name          | CAS number   | Molecular formula                                           | Molecular weight<br>g/mol |
|---------------|--------------|-------------------------------------------------------------|---------------------------|
| melamine      | CAS 108-78-1 | C <sub>3</sub> H <sub>6</sub> N <sub>6</sub>                | 126.12                    |
| cyanuric acid | CAS 108-80-5 | C <sub>3</sub> H <sub>3</sub> N <sub>3</sub> O <sub>3</sub> | 129.07                    |
| ammelide      | CAS 645-93-2 | C <sub>3</sub> H <sub>4</sub> N <sub>4</sub> O <sub>2</sub> | 128.09                    |
| ammeline      | CAS 645-92-1 | C <sub>3</sub> H <sub>5</sub> N <sub>5</sub> O              | 127.11                    |

Table S2 Curve fitting results of the dose-response data

|             | Equations                    | Model parameters |          | R <sup>2</sup> |
|-------------|------------------------------|------------------|----------|----------------|
|             |                              | <i>a</i>         | <i>b</i> |                |
| Exponential | $y = a \cdot (1 - e^{-x/b})$ | 285              | 9.61     | 0.976          |
| Logarithm   | $\ln y = a + b \cdot \ln x$  | 4.70             | 0.314    | 0.992          |
| Hyperbola   | $y = a \cdot x / (b + x)$    | 318              | 6.30     | 0.998          |
